# Supplementary material for: Physiological reactions to acute stressors and subjective stress during daily life: A systematic review on ecological momentary assessment (EMA) studies
Source: PubMed Central journal article supplement (PMC9328558; doi:10.1371/journal.pone.0271996), 2022-07-27
Supplement: pone.0271996.s001.pdf [file pone.0271996.s001.pdf]

## S1 Table

**Article title:** Physiological reactions to acute stressors and subjective stress during daily life: A systematic review on ecological momentary assessment (EMA) studies

**Authors:** Jeannette Weber, Peter Angerer, Jennifer Apolinário-Hagen

Institute of Occupational-, Social- and Environmental Medicine, Centre for Health and Society, Medical Faculty, Heinrich-Heine-University Düsseldorf, Moorenstraße 5, 40225 Düsseldorf, Germany

**S1 Table. Free text search terms and MeSH terms for physiological stress reactions**

| Stress reactions                         | Free text search terms                                                     | MeSH terms PsycINFO                      | MeSH terms Pubmed                      |
|------------------------------------------|----------------------------------------------------------------------------|------------------------------------------|----------------------------------------|
| Autonomic nervous system                 | autonomic nervous system; autonomic function*; sympathetic nervous system  | exp autonomic nervous system/            | exp Autonomic Nervous System/          |
| Norepinephrine and epinephrine           | *adrenaline; *epinephrine; catecholamine*                                  | exp Catecholamines/                      | exp Catecholamines/                    |
| alpha-Amylase                            | alpha-amylase                                                              | -                                        | exp alpha-Amylases/                    |
| Electrodermal activity                   | electrodermal activity; skin conductance; galvanic skin response           | exp Galvanic Skin Response/              | exp Galvanic Skin Response/            |
| Hypothalamic-pituitary-adrenal axis      | hypothalamic pituitary; HPA axis                                           | exp Hypothalamic Pituitary Adrenal Axis/ | exp Hypothalamo-Hypophyseal System/    |
| Cortisol                                 | Cortisol; glucocorticoid*                                                  | exp Hydrocortisone/                      | exp Hydrocortisone/                    |
| ACTH                                     | adrenocorticotrop*; ACTH                                                   | exp Corticotropin/                       | exp Adrenocorticotropic Hormone        |
| Corticotropin Releasing hormone (CRH)    | corticotrop*; CRH                                                          | exp Corticotropin Releasing Factor/      | exp Corticotropin-Releasing Hormone/   |
| Dehydroepiandrosterone                   | Dehydroepiandrosterone; DHEA                                               | -                                        | exp Dehydroepiandrosterone/            |
| Other biomarkers of stress               | Biomarker* NEAR/1 stress                                                   |                                          |                                        |
| Serotonin                                | Serotonin; dopamine; neurotransmitter*; hormone*;                          | *Serotonin/                              | exp Serotonin/                         |
| Dopamine                                 | monoamine                                                                  |                                          |                                        |
| Acetylcholine                            | acetylcholine                                                              | exp Acetylcholine/                       | exp Acetylcholine/                     |
| GABA                                     | GABA; aminobutyric acid                                                    | exp gamma aminobutyric acid/             | exp gamma-Aminobutyric Acid/           |
| Chromogranin A                           | chromogranin A                                                             | -                                        | exp Chromogranin A/                    |
| Brain derived neurotrophic factor (BDNF) | brain derived neurotrophic factor; brain derived neurotrophic factor; BDNF | exp Brain Derived Neurotrophic factor/   | exp Brain-Derived Neurotrophic Factor/ |
| Cardiac troponin T (CTT)                 | cardiac                                                                    | -                                        | exp Troponin T/                        |
| Neuropeptide Y (NPY)                     | neuropeptide Y; NPY                                                        | exp Neuropeptide Y/                      | exp Neuropeptide Y/                    |

|                                    |                                                                                                          |                                                                                               |                                                                               |
|------------------------------------|----------------------------------------------------------------------------------------------------------|-----------------------------------------------------------------------------------------------|-------------------------------------------------------------------------------|
| Orexin A                           | orexin A                                                                                                 | exp Orexin/                                                                                   | exp Orexins/                                                                  |
| Oxytocin                           | oxytocin                                                                                                 | exp Oxytocin/                                                                                 | exp Oxytocin/                                                                 |
| Physiological reactions            |                                                                                                          |                                                                                               |                                                                               |
| Brain                              |                                                                                                          |                                                                                               |                                                                               |
| Altered brain activity             | electroencephalogra*; EEG; brain NEAR/2 activity; brain waves; brainwaves                                | Exp Electroencephalography/                                                                   | exp Electroencephalography/                                                   |
| Eyes                               |                                                                                                          |                                                                                               |                                                                               |
| Pupil diameter                     | pupil diameter; size NEAR/2 pupil; dilation NEAR/2 pupil; dilatation NEAR/2 pupil; eye gaze; eye track*; | exp Pupil Dilation/                                                                           | -                                                                             |
| Eye gaze                           | blink* rate*; blink* frequency; eye blink**                                                              | exp Eye Movements/                                                                            | exp Eye Movements/                                                            |
| Blink rates                        |                                                                                                          | -                                                                                             | exp Blinking/                                                                 |
| Respiration                        |                                                                                                          |                                                                                               |                                                                               |
| Bronchodilation                    | respirat*; breathing; *plethysmograph*                                                                   | exp Respiration/ OR exp Plethysmography/                                                      | exp Respiration/ or exp Plethysmography/ or exp Vital Signs                   |
| Rapid breathing                    |                                                                                                          |                                                                                               |                                                                               |
| Muscle                             |                                                                                                          |                                                                                               |                                                                               |
| Muscle tension                     | musc* tension; musc* tone; musc* tonus; musc* activity; electromyogra*; EMG                              | exp Muscle Contractions/ OR exp Muscle Relaxation/ OR exp Muscle Tone OR exp Electromyography | exp Muscle Contraction/ or exp Muscle Tonus or exp Electromyography/          |
| Cardiovascular                     |                                                                                                          |                                                                                               |                                                                               |
| Heart rate; heart rate variability | Cardiovascular; cardiac                                                                                  | exp Cardiovascular Reactivity/                                                                | -                                                                             |
|                                    | heart rate; electrocardiogra*; ECG                                                                       | exp Heart Rate/                                                                               | exp Vital Signs/ or exp Electrocardiography, Ambulatory/ or exp Hemodynamics/ |
| Cardiac output                     | cardiac                                                                                                  | -                                                                                             | exp Hemodynamics/                                                             |
| Blood pressure                     | blood pressure                                                                                           | exp Blood Pressure/                                                                           | exp Vital Signs/ or exp Hemodynamics/                                         |
| Changes of blood circulation       | blood flow; blood circulation; *plethysmograph*                                                          | exp Blood Flow/                                                                               | exp Hemodynamics/                                                             |
| Coagulation                        | *coagulation; *coagulability; clotting; fibrino*; prothrombin time; von Willebrand factor; hemostasis    | exp Blood Coagulation/                                                                        | exp Hemostasis/                                                               |
| Metabolism                         |                                                                                                          |                                                                                               |                                                                               |
| Plasma glucose levels              | Glucose; blood sugar                                                                                     | exp Glucose/                                                                                  | exp Glucose/                                                                  |
| Thermogenesis                      |                                                                                                          |                                                                                               |                                                                               |
| Skin temperature                   | Thermogenesis; temperature                                                                               | exp Body Temperature/                                                                         | exp Vital Signs/ or exp Body Temperature/                                     |
| Sweat rate                         | sweat rate; sweating; sweat production                                                                   | exp Sweating                                                                                  | exp Body Temperature/                                                         |
| Immune response                    | immune                                                                                                   | exp Immunology/                                                                               | exp Immune System/                                                            |
| Immunoglobuline A                  | immunoglobulin*                                                                                          | exp Immunology/                                                                               | exp Immunoglobulins/                                                          |
| Lysozyme                           | Lysozyme; muramidase                                                                                     | -                                                                                             | exp Muramidase/                                                               |
| IL-6                               | cytokine*; interleukin*                                                                                  | exp Immunology/                                                                               | exp Cytokines/                                                                |
| IL-1 $\beta$                       |                                                                                                          |                                                                                               |                                                                               |
| TNF-alpha                          | tumor necrosis factor; TNF                                                                               | exp Immunology/                                                                               | exp Cytokines/                                                                |
| C-reactive protein                 | C-reactive protein, CRP                                                                                  | -                                                                                             | exp C-Reactive Protein/                                                       |

---

|                     |                                                                                                                                                   |                 |                 |
|---------------------|---------------------------------------------------------------------------------------------------------------------------------------------------|-----------------|-----------------|
| Altered blood count | natural killer cell*; NK cell*; leukocyte*; leucocyte*;<br>white blood cell*; lymphocyte*; B cell*; T cell*;<br>monocyte*; CD* cell*; neutrophil* | exp Leucocytes/ | exp Leukocytes/ |
|---------------------|---------------------------------------------------------------------------------------------------------------------------------------------------|-----------------|-----------------|

---
