# Supplementary material for: Physiological reactions to acute stressors and subjective stress during daily life: A systematic review on ecological momentary assessment (EMA) studies
Source: PubMed Central journal article supplement (PMC9328558; doi:10.1371/journal.pone.0271996), 2022-07-27
Supplement: pone.0271996.s004.pdf [file pone.0271996.s004.pdf]

## S4 Table

**Article title:** Physiological reactions to acute stressors and subjective stress during daily life: A systematic review on ecological momentary assessment (EMA) studies

**Authors:** Jeannette Weber, Peter Angerer, Jennifer Apolinário-Hagen

Institute of Occupational-, Social- and Environmental Medicine, Centre for Health and Society, Medical Faculty, Heinrich-Heine-University Düsseldorf, Moorenstraße 5, 40225 Düsseldorf, Germany

**S4 Table. Description of studies examining within-subject associations between acute stress and cardiovascular outcomes**

| Study                            | Study population and setting                                                                    | Exposure variable (scale range <sup>1</sup> )                       | Sampling schedule per participant | Max. time lag between exposure and outcome | Results (direct association between exposure and outcome)                                                                                                                                                                                                                                                                                                                                                                                                                                                                                                            |
|----------------------------------|-------------------------------------------------------------------------------------------------|---------------------------------------------------------------------|-----------------------------------|--------------------------------------------|----------------------------------------------------------------------------------------------------------------------------------------------------------------------------------------------------------------------------------------------------------------------------------------------------------------------------------------------------------------------------------------------------------------------------------------------------------------------------------------------------------------------------------------------------------------------|
| <b>Balducci et al., 2021 (1)</b> | 61 workers in Italy; M <sub>age</sub> =47.5 (SD=12, range 23-68), female: 43%                   | Severity of acute stressors at work (scale range: 1-7)              | 10 days; daily                    | Same day                                   | <u>SBP</u> : No association (WS: b=0.34, SE=0.48, p>.05)                                                                                                                                                                                                                                                                                                                                                                                                                                                                                                             |
| <b>Bishop et al., 2003 (2)</b>   | 92 police patrol officers at work in Singapore; M <sub>age</sub> =26.85 (SD=5.15) female: 0%    | Severity of acute stressors at work: job demands (scale range: 1-4) | 1 day; every 30 minutes           | 10 minutes                                 | Moderation effect of job control was included in the following models:<br><u>SBP</u> : No association (BS: b=-.29, SE=0.99, p>.05; WS: b=0.16, SE=0.16, p>.05)<br><u>DBP</u> : No association (BS: b=.10, SE=0.65, p>.05; WS: b=0.38, SE=0.31, p>.05)<br><u>HR</u> : No association (BS: b=-.06, SE=1.11, p>.05; WS: b=0.45, SE=0.31, p>.05).<br><u>Mean arterial pressure</u> : No association (BS: b=-.03, SE=0.69, p>.05; WS: b=0.33, SE=0.28, p>.05).<br><u>Pressure rate product</u> : No association (BS: b=-.04, SE=0.17, p>.05; WS: b=0.08, SE=0.05, p>.05). |
| <b>Bowen et al., 2014 (3)</b>    | 94 heterosexual couples (N=188) at workplace and in the evening at home with partner in the US; | Global subjective stress (scale range: 1-4)                         | 1 day; every 30 minutes           | concurrent                                 | <u>SBP</u> : Positive association (p<.01)<br><u>DBP</u> : Positive association (p<.05)                                                                                                                                                                                                                                                                                                                                                                                                                                                                               |

|                                      |                                                                                                                                                                                                |                                                                                                                                  |                                                                              |            |                                                                                                                                                                                                                                                                                                                                                                                                                                                                                                                            |
|--------------------------------------|------------------------------------------------------------------------------------------------------------------------------------------------------------------------------------------------|----------------------------------------------------------------------------------------------------------------------------------|------------------------------------------------------------------------------|------------|----------------------------------------------------------------------------------------------------------------------------------------------------------------------------------------------------------------------------------------------------------------------------------------------------------------------------------------------------------------------------------------------------------------------------------------------------------------------------------------------------------------------------|
|                                      | $M_{age}=29.6$<br>( $SD=8.6$ ), female:<br>50%                                                                                                                                                 |                                                                                                                                  |                                                                              |            |                                                                                                                                                                                                                                                                                                                                                                                                                                                                                                                            |
| <b>Brondolo et al., 2003 (4)</b>     | 104 participants in the US;<br>$M_{age}=30$ ( $SD=7.7$ , range=18-46); female: 62%                                                                                                             | Severity of acute stressors regarding social interactions (scale range: 1-5)                                                     | 1 day; every 20 minutes                                                      | concurrent | <u>SBP</u> : Positive association (WS: $b=1.97$ , $SE=0.96$ , $p<.05$ ; BS: $b=7.76$ , $SE=4.94$ , $p>.05$ ),<br><u>DBP</u> : Positive association (WS: $b=2.28$ , $SE=0.59$ , $p<.001$ ; BS: $b=2.49$ , $SE=2.86$ , $p>.05$ )<br><u>HR</u> : No association (WS: $b=1.67$ , $SE=0.89$ , $p>.05$ ; BS: $b=-6.76$ , $SE=3.83$ , $p>.05$ )                                                                                                                                                                                   |
| <b>Buckley et al., 2004 (5)</b>      | 36 Vietnam veterans (19 with post-traumatic stress disorder (PTSD), 17 without PTSD) in the US;<br>$M_{age}=51.1$ ( $SD=3.3$ ) with PTSD; $M_{age}=53.4$ ( $SD=3.1$ ) without PTSD; female: 0% | Global subjective stress (dichotomous scale: 0/1);                                                                               | 1 day; every 20 minutes                                                      | concurrent | Moderation effect of PTSD was included in the following models:<br><u>SBP</u> : No association (WS: $b=-2.99$ , $SE=2.76$ , $p>.05$ )<br><u>DBP</u> : No association (WS: $b=-1.48$ , $SE=1.88$ , $p>.05$ )<br><u>HR</u> : No association (WS: $b=-4.53$ , $SE=2.55$ , $p>.05$ )                                                                                                                                                                                                                                           |
| <b>Carels et al., 2003 (6)</b>       | 45 participants with congestive heart failure in the US; $M_{age}=66$ ( $SD=11.7$ ); female: 39%                                                                                               | Severity of acute stressors at work: job demands (scale range: 1-5)                                                              | 1 day; exposure: 2 times/hour<br>outcome: continuously (aggregated per hour) | 1 hour     | <u>Frequency of premature ventricular contractions</u> : No association (WS: $b=1.1$ , $SE=11.1$ , $p=.92$ )<br><u>Frequency of repetitive premature ventricular contractions</u> : No association (WS: $b=0.2$ , $SE=7.3$ , $p=.982$ )<br><u>Tachycardia</u> : No association (WS: $b=1.6$ , $SE=2.7$ , $p=.544$ )                                                                                                                                                                                                        |
| <b>Conley &amp; Lehman, 2012 (7)</b> | 99 undergraduate students in the US; $M_{age}=21$ ; female: 70%                                                                                                                                | Occurrence of acute and anticipated stressors in education (dichotomous scale: 0 = no stressor occurred, 1 = stressor occurred); | 4 days exposure: daily<br>outcome: hourly                                    | 1 hour     | <u>SBP</u> : Positive association with acute stressors (WS: $b=3.80$ , $SE=1.21$ , $p=.002$ ). No association with anticipated stressors (WS: $b=-0.53$ , $SE=0.56$ , $p=0.345$ );<br><u>DBP</u> : No association with acute stressors (WS: $b=1.29$ , $SE=1.14$ , $p=.259$ ) or anticipated stressors (WS: $b=0.28$ , $SE=0.50$ , $p=.581$ );<br><u>HR</u> : No association with acute academic stressors (WS: $b=2.32$ , $SE=1.65$ , $p=.163$ ) or anticipated academic stressor (WS: $b=-0.63$ , $SE=0.68$ , $p=.357$ ) |
| <b>Dennis et al., 2016 (8)</b>       | 219 participants with PTSD and without PTSD in the US;<br>$M_{age}=30.32$                                                                                                                      | Global subjective stress (scale range: 0-4);                                                                                     | 1 day; exposure: not reported;<br>outcome: continuously                      | 5 minutes  | <u>HRV (low frequency domain)</u> : Negative association (WS: $b=-1.14$ , $SE=0.37$ , $p<.01$ ; BS: $b=0.44$ , $SE=1.24$ , $p>.10$ )<br><u>HRV (High frequency domain)</u> : No association (WS: $b=-0.57$ , $SE=0.31$ , $p<.10$ ; BS: $b=1.06$ , $SE=1.02$ , $p>.10$ )<br><u>HR</u> : No association (WS: $b=0.49$ , $SE=0.30$ , $p>.10$ ; BS: $b=-0.94$ , $SE=1.01$ ,                                                                                                                                                    |

(SD=5.42, range=18-39) with PTSD;  $M_{age}=27.8$  (SD=5.47, range=18-39) without PTSD; female: 49% with PTSD; 53% without PTSD

$p>.10$ )

|                                   |                                                                                                               |                                                                                                                                                                  |                                                          |            |                                                                                                                                                                                                                                                                                                                                                                                                                                                                                                                                                                                                                                                                                                                                                                                                                                                                                   |
|-----------------------------------|---------------------------------------------------------------------------------------------------------------|------------------------------------------------------------------------------------------------------------------------------------------------------------------|----------------------------------------------------------|------------|-----------------------------------------------------------------------------------------------------------------------------------------------------------------------------------------------------------------------------------------------------------------------------------------------------------------------------------------------------------------------------------------------------------------------------------------------------------------------------------------------------------------------------------------------------------------------------------------------------------------------------------------------------------------------------------------------------------------------------------------------------------------------------------------------------------------------------------------------------------------------------------|
| <b>Enkelmann et al., 2005 (9)</b> | 108 male police patrol officers at shift with patrol duties in Singapore; $M_{age}=26.9$ (SD=5.7); female: 0% | Severity of acute stressors in social interactions                                                                                                               | 1 day; every 30 minutes                                  | 10 minutes | <u>SBP/DBP</u> : No main effects reported                                                                                                                                                                                                                                                                                                                                                                                                                                                                                                                                                                                                                                                                                                                                                                                                                                         |
| <b>French, 2017 (10)</b>          | 100 full-time workers in the US; $M_{age}=33.09$ (SD=9.09); female: 63%                                       | Occurrence of acute stressors regarding work-family conflict (momentary conflict - dichotomous scale: 0/1; accumulated conflict - sum of conflicts)              | 3 days; 8 times/day                                      | 2 hours    | <u>SBP</u> : No association with momentary ( $\beta=-1.40$ , $p=.09$ ) of daily accumulated ( $\beta=0.18$ , $p=.63$ ) work-to-family conflict and momentary family-to-work conflict ( $\beta=-0.11$ , $p=.88$ ), positive association with daily accumulated family-to-work conflict ( $\beta=0.68$ , $p<.01$ )<br><u>DBP</u> : no association with momentary ( $\beta=0.46$ , $p=.05$ ) and daily accumulated ( $\beta=-0.01$ , $p=.98$ ) work-to-family conflict and momentary ( $\beta=0.93$ , $p=.15$ ) and daily accumulated ( $\beta=0.24$ , $p=.24$ ) family-to-work conflict<br><u>HR</u> : No association with momentary ( $\beta=0.69$ , $p=.47$ ) or daily accumulated ( $\beta=-0.54$ , $p=.26$ ) work-to-family conflict. Negative association with momentary ( $\beta=-1.97$ , $p=.03$ ) and daily accumulated ( $\beta=-0.92$ , $p<.01$ ) family-to-work conflict |
| <b>Gaggioli, 2013 (11)</b>        | 6 participants in Italy; $M_{age}=22$ ; female: 50%                                                           | Severity of acute stressors: overall, in current activity and regarding social interactions (scale range: -0 - 3); global subjective stress (scale range: 1- 10) | 7 days; exposure: 5-6 times/day<br>outcome: continuously | 12 minutes | <u>HR</u> : HR measured between 4 to 0 minutes before, was positively correlated with severity of acute stressors ( $r=0.173$ , $p=.032$ ) and global subjective stress ( $r=0.205$ , $p=.004$ ). HR measured between 8 to 4 minutes before, was positively correlated with severity of acute stressors ( $r=0.175$ , $p=.031$ ) and global subjective stress ( $r=0.176$ , $p=0.014$ ). HR measured between 12 to 8 minutes before, was positively correlated global stress ( $r=0.168$ , $p=0.021$ ) but not with severity of acute stressors ( $r=0.151$ , $p=.066$ ). No significant correlation between HR and severity of acute stressors in current activity and social interactions.                                                                                                                                                                                      |
| <b>Gallo et al., 2006 (12)</b>    | 205 adolescents on school days in the US; Age Range 14-16; female: 50%                                        | Severity of acute stressors regarding social interactions: conflicting social                                                                                    | 2 days; every 30 minutes                                 | 10 minutes | Moderation effects of attachment were included in those models:<br><u>SBP</u> : No association with pleasant/unpleasant interactions ( $b=0.23$ , $SE=0.16$ , $p>.10$ ) and conflicting interactions ( $b=0.05$ , $SE=0.19$ , $p>.10$ )<br><u>DBP</u> : Positive association with pleasant/unpleasant interaction ( $b=0.24$ , $SE=0.10$ , $p<.05$ ). No direct association with conflicting interaction ( $b=0.13$ ,                                                                                                                                                                                                                                                                                                                                                                                                                                                             |

interactions and pleasant/unpleasant social interactions (scale range: 1-6)

SE=0.12,  $p > .10$ )  
 HR: No association with pleasant/unpleasant interaction ( $b=0.30$ , SE=0.13,  $p < .10$ ) or conflicting interaction ( $b=-0.02$ , SE=0.14,  $p > .10$ )

|                                                             |                                                                                                      |                                                                                                                                                                                             |                                                          |            |                                                                                                                                                                                                                                                                                                                                                                                            |
|-------------------------------------------------------------|------------------------------------------------------------------------------------------------------|---------------------------------------------------------------------------------------------------------------------------------------------------------------------------------------------|----------------------------------------------------------|------------|--------------------------------------------------------------------------------------------------------------------------------------------------------------------------------------------------------------------------------------------------------------------------------------------------------------------------------------------------------------------------------------------|
| <b>Hawkey et al., 2003 (13)</b>                             | 70 undergraduate students in the US; $M_{age}=19.2$ (SD=1.0); female: 50%                            | Severity of acute stressors in current activity (scale range: 1-5)                                                                                                                          | 1 day; 9 times/day                                       | concurrent | <u>SBP, DBP, mean ambulatory blood pressure, HR, pre-ejection period, respiratory sinus arrhythmia or stroke volume</u> : no association                                                                                                                                                                                                                                                   |
| <b>Ilies et al., 2010 (14)</b>                              | 64 university employees in the US; $M_{age}=42.58$ (SD=9.44); female: 80%                            | Severity of acute stressors at work: job demands (scale range: 1-5)                                                                                                                         | 10 days; 3 times/day (aggregated per day)                | concurrent | <u>SBP</u> : Positive association (WS: $b=2.48$ , $\beta=0.16$ , $t=1.81$ , $p < .05$ )                                                                                                                                                                                                                                                                                                    |
| <b>Johnston et al., 2016 (15)</b>                           | 100 Nurses at working shifts in medical and surgical wards in Scotland; $M_{age}=36.4$ ; female: 93% | Severity of acute stressors at work – job demands, work effort (dichotomous rating scale: 0/1)                                                                                              | 2 days; exposure: every 90 minutes outcome: continuously | concurrent | HR: Positive association with demands (WS: $\beta=0.84$ , SE=0.11, $p < .05$ ; BS: $\beta=2.86$ , SE=1.11, $p < .05$ ) and effort (WS: $\beta=0.86$ , SE=0.14, $p < .05$ ; BS: $\beta=3.25$ , SE=1.40, $p < .05$ ).                                                                                                                                                                        |
| <b>Kamarcik et al., 2002 (16)</b>                           | 340 older adults in the US; $M_{age}$ = not reported; female: 51%                                    | Severity of acute stressors at work: job demands and regarding social interactions (scale range: 1-4)                                                                                       | 6 days; every 45 minutes                                 | 10 minutes | <u>SBP</u> : Positive association with job demands (WS: $b=0.18$ , $p < .05$ , BS: $b=0.15$ , $p < .01$ ) and social interactions (WS: $b=0.41$ , $p < .05$ , BS: $b=0.04$ , $p > .05$ ).<br><u>DBP</u> : Positive association with job demands (WS: $b=0.26$ , $p < .0001$ , BS: $b=0.12$ , $p < .05$ ) and social interactions (WS: $b=0.17$ , $p < .0001$ , BS: $b=0.01$ , $p > .05$ ). |
| <b>Kamarcik et al., 2018 (17); Thomas et al., 2019 (18)</b> | 477 working midlife adults in the US; $M_{age}=42.7$ (SD=7.3, range=30-54); female: 52%              | Occurrence of acute stressors at work: task strain - ratio between demands and control (dichotomous scale: 1 = high demands and low control, 0 = all other conditions) and regarding social | 4 days; hourly                                           | 10 minutes | <u>SBP</u> : Positive association with task strain (WS: $b=0.67$ , $p=.003$ ) and social interactions (WS: $b=0.47$ , $p=.003$ )<br><u>DBP</u> : Positive association with task strain (WS: $b=0.63$ , $p < .001$ ). No association with social interactions (WS: $b=0.16$ , $p=.16$ )                                                                                                     |

|                                   |                                                                                                                                                                                | interactions<br>(scale range: 1-6)                                                                                                    |                                                            |                                           |                                                                                                                                                                                                                                                                                    |
|-----------------------------------|--------------------------------------------------------------------------------------------------------------------------------------------------------------------------------|---------------------------------------------------------------------------------------------------------------------------------------|------------------------------------------------------------|-------------------------------------------|------------------------------------------------------------------------------------------------------------------------------------------------------------------------------------------------------------------------------------------------------------------------------------|
| <b>Kamarc et al., 1998 (19)</b>   | 120 full time workers as part of the Pittsburgh study in the US; M <sub>age</sub> =35 (range=23-50); female: 53%                                                               | Severity of acute stressors at work: job demands (dichotomous rating scale: 0/1) and regarding social interactions (scale range: 1-4) | 6 days; every 45 minutes                                   | 10 minutes                                | <u>SBP</u> : No association with job demands (WS: b=-0.29, p=.06) or social interactions<br><u>DBP</u> : No association with job demands or social interactions<br><u>HR</u> : No association with social interactions. Positive association with job demands (WS: b=0.50, p<.05). |
| <b>Luecken et al., 2009 (20)</b>  | 91 undergraduate students (loss group experienced childhood parental death, control group did not experience childhood parental death) in the US; age range=18-29; female: 63% | Occurrence of any acute stressors (dichotomous scale: 0/1)                                                                            | 1 day; every 30 minutes                                    | 30 minutes                                | <u>SBP</u> : Positive association (WS: b=1.8, t(2179)=3.2, p=.001)<br><u>DBP</u> : Positive association (WS: b=1.0, t(2247)=2.2, p=.031)                                                                                                                                           |
| <b>Lumley et al., 2014 (21)</b>   | 40 female managers at work working in private or public sectors in Sweden; M <sub>age</sub> =36.03 (SD=4.81); female: 100%                                                     | Global subjective stress (scale range: 1-6);                                                                                          | 1 day; exposure: 3-14 times outcome: continuously          | concurrent                                | <u>HR</u> : Positive association (WS: b=0.94, p.018)                                                                                                                                                                                                                               |
| <b>Määttäen et al., 2021 (22)</b> | 44 students in Finland; M <sub>age</sub> =25.0 (SD=5.4, range 20-47), female: 80%                                                                                              | Occurrence of any acute stressor (dichotomous scale)                                                                                  | 3-5 days; exposure: every 45 minutes outcome: continuously | concurrent                                | <u>HRV – SDNN</u> : No association (WS: p=0.09-0.44)                                                                                                                                                                                                                               |
| <b>Pieper et al., 2007</b>        | 73 teachers at secondary schools in the                                                                                                                                        | Occurrence of any acute stressor                                                                                                      | 4 days; exposure: hourly                                   | Pieper et al. 2007: 1 hour; Pieper et al. | <u>Pieper et al., 2007 (23)</u> :<br><u>HR</u> : Positive association (b=2.75, SE=0.77, CI=1.98-3.52, z=3.55, p<.001)                                                                                                                                                              |

|                                                             |                                                                                                                                   |                                                                                                                                             |                                                                 |                                            |                                                                                                                                                                                                                                                                                                                                                                                                                                                                                                                                                               |
|-------------------------------------------------------------|-----------------------------------------------------------------------------------------------------------------------------------|---------------------------------------------------------------------------------------------------------------------------------------------|-----------------------------------------------------------------|--------------------------------------------|---------------------------------------------------------------------------------------------------------------------------------------------------------------------------------------------------------------------------------------------------------------------------------------------------------------------------------------------------------------------------------------------------------------------------------------------------------------------------------------------------------------------------------------------------------------|
| <b>(23)/<br/>Pieper<br/>et al.,<br/>2010<br/>(24)</b>       | Netherlands;<br>M <sub>age</sub> =24.4<br>(SD=3.5); female:<br>33%                                                                | (dichotomous<br>scale: 0/1)                                                                                                                 | outcome:<br>continuously                                        | 2010:<br>15<br>minutes, 1 hour,<br>2 hours | <u>RMSSD</u> : No association (b=-0.05, SE=0.03, p=.098)<br><u>Pieper et al., 2010 (24)</u> :<br><u>HR</u> : No association<br><u>RMSSD</u> : No association                                                                                                                                                                                                                                                                                                                                                                                                  |
| <b>Pollard<br/>et al.,<br/>2007<br/>(25)</b>                | 33 university<br>employees in<br>non-manual jobs<br>at working days<br>in UK; M <sub>age</sub> =43.1<br>(SD=9.8); female:<br>100% | Global subjective<br>stress (scale<br>range: 1-7)                                                                                           | 2 days; 6<br>times/day                                          | 1 hour                                     | <u>SBP</u> : Positive association (WS: b=1.39, t=3.65, p<.001)<br><u>DBP</u> : Positive association (WS: b=0.88, t=2.93, p=.004)<br><u>HR</u> : Positive association (WS: b=0.98, t=2.69, p=.008)                                                                                                                                                                                                                                                                                                                                                             |
| <b>Potter,<br/>2019<br/>(26)</b>                            | 26 adults being<br>overweight in the<br>US; M <sub>age</sub> = 27.51<br>(SD=9.83);<br>female: 56%                                 | Global subjective<br>stress (scale<br>range: 0-4)                                                                                           | 7 days;<br>exposure: 6<br>times/day<br>outcome:<br>continuously | concurrent                                 | <u>HR</u> : No association (b=2.31-2.46, SE=4.37-4.39, p=.57-.60)                                                                                                                                                                                                                                                                                                                                                                                                                                                                                             |
| <b>Schilling<br/>et al.,<br/>2020<br/>(27)</b>              | 173 police<br>workers in<br>Switzerland; M <sub>age</sub><br>= 37.64<br>(SD=9.80);<br>female: 34%                                 | Global subjective<br>stress (scale<br>range: 1-5)                                                                                           | 2 days;<br>exposure: 8<br>times/day<br>outcome:<br>continuously | concurrent                                 | Moderation effect of cardiorespiratory fitness was included in the model:<br><u>HRV - RMSSD</u> : No association (WS: β=-0.02, SE=0.03, p=0.437)                                                                                                                                                                                                                                                                                                                                                                                                              |
| <b>Schmid<br/>&amp;<br/>Thomas,<br/>2020<br/>(28)</b>       | 101 school<br>teachers in<br>Germany; M <sub>age</sub> =<br>42.87<br>(SD=11.46);<br>female: 69%                                   | Severity of acute<br>stressors at work<br>(scale range: 1-<br>7)                                                                            | 2 days;<br>exposure: 6<br>times/day<br>outcome:<br>continuously | 2 hours                                    | <u>HRV - RMSSD</u> : No association (WS for emotional demands: b=0.00, SE=0.01, P=0.736; WS for time pressure: b=-0.02, SE=0.01, p=0.06)                                                                                                                                                                                                                                                                                                                                                                                                                      |
| <b>Schwerd<br/>tfefer &amp;<br/>Dick,<br/>2019<br/>(29)</b> | 43 male<br>firefighters at<br>work in Germany;<br>M <sub>age</sub> =32.7<br>(SD=6.9); female:<br>0%                               | Severity of acute<br>stressors at work<br>(dichotomous<br>rating scale: 1 =<br>baseline - 3 =<br>high stressful<br>emergency<br>operations) | 1 day;<br>exposure:<br>hourly<br>outcome:<br>continuously       | 1 hour                                     | Moderation effects of resilience were included in those models:<br><u>HRV</u> : lnRMSSD was negatively associated with stressful emergency-<br>operations (b=-0.23, SE=0.08, 95% CI=-0.39 - -0.08). lnSDNN tended to<br>be negatively associated with stressful emergency operations (b=-0.12,<br>SE=0.06, 95%CI = -0.24 - 0.00).                                                                                                                                                                                                                             |
| <b>Shockle<br/>y et al.,<br/>2013<br/>(30)</b>              | 58 employees in<br>the US;<br>M <sub>age</sub> =37.5;<br>female: 90%                                                              | Occurrence of<br>acute stressors<br>regarding work-<br>family conflict<br>(dichotomous<br>rating scale: 0/1)                                | 10 days;<br>exposure: daily<br>outcome: 4<br>times/day          | not reported<br>(approximately 6<br>hours) | <u>SBP</u> : No association with work-family conflict (WS: β=0.02, SE=0.01, p>.05), work-to-family conflict (WS: β=0.01, SE=0.01, p>.05) or family-to-work conflict (WS: β=0.01, SE=0.01, p>.05)<br><u>DBP</u> : No association with work-family conflict (WS: β=0.00, SE=0.02, p>.05), work-to-family conflict (WS: β=-0.01, SE=0.01, p>.05) or family-to-work conflict (WS: β=0.00, SE=0.02, p>.05)<br><u>HR</u> : Positive association with work-family conflict (WS: β=0.04, SE=0.02, p<.05) and family-to-work conflict (WS: β=0.05, SE=0.02, p<.01). No |

|                                       |                                                                                                            |                                                                                                                                                   |                                                                                  |                                           |                                                                                                                                                                                                                                                                   |
|---------------------------------------|------------------------------------------------------------------------------------------------------------|---------------------------------------------------------------------------------------------------------------------------------------------------|----------------------------------------------------------------------------------|-------------------------------------------|-------------------------------------------------------------------------------------------------------------------------------------------------------------------------------------------------------------------------------------------------------------------|
| <b>Simon et al., 2020 (31)</b>        | 174 adults in the US; M <sub>age</sub> = 31.23 (SD=6.49, range 18-46); female: 50%                         | Global subjective stress (dichotomous scale: 0/1)                                                                                                 | 5 days; exposure: every 30 minutes<br>outcome: continuously                      | not reported (approximately < 30 minutes) | association with work-to-family conflict (WS: $\beta=0.02$ , SE=0.02, p>.05)<br>HR: Positive association (WS: b=.93, SE=.19, p<.001)<br>HRV-HF: Negative association (WS: b=-.02, SE=.01, p=.024)<br>HRV-RMSSD: Negative association (WS: b=-.02, SE=.01, p=.006) |
| <b>Smith et al., 2007 (32)</b>        | 80 patients with acute myocardial infarction in the US; M <sub>age</sub> = 57 (SD=11); female: 35%         | Global subjective stress (scale range: 1-4)                                                                                                       | 1 day; exposure: every 30 minutes<br>outcome: continuously (aggregated per hour) | concurrent                                | <u>Number of ventricular premature beats</u> : Positive association (WS: b=0.74, 95% CI=0.50-0.99 p<.001)                                                                                                                                                         |
| <b>Uchino et al., 2006 (33)</b>       | 214 middle-aged and older married couples in the US (N=428); M <sub>age</sub> =52.8 (SD=10.0); female: 50% | Occurrence of any acute stressor (dichotomous rating scale: 0/1)                                                                                  | 1 day; every 45 minutes                                                          | concurrent                                | <u>SBP</u> : No association<br><u>DBP</u> : Positive association (WS: b=1.71, p<.01)                                                                                                                                                                              |
| <b>Wong &amp; Kelloway, 2016 (34)</b> | 55 care workers at work in Canada; M <sub>age</sub> =43 (SD=9, range=25-62); female: 93%                   | Severity of acute stressors regarding social interactions (scale range: 1 - 5*)                                                                   | 1 day; hourly                                                                    | 15 minutes                                | <u>SBP</u> : Negative association (WS: b=-1.59, SE=0.68, 95% CI=-2.93- -0.24, p<.05)                                                                                                                                                                              |
| <b>Wrzus et al., 2013 (35)</b>        | 89 participants in Germany; M <sub>age</sub> =42.4 (SD=19.0); female: 55%                                  | Acute stressors: circumscribed acute stressors = 1 life domain affected; complex acute stressor > 1 life domain affected (dichotomous scale: 0/1) | 2 days; exposure: 6 times/day<br>outcome: continuously                           | 2 hours                                   | Moderation effects of age were included in those models:<br><u>RMSSD</u> : No direct association with circumscribed (WS: b=-0.06, p>.05) and complex acute stressors (WS: b=-0.20, p>.05).                                                                        |

**Notes.** Abbreviations: b= unstandardized regression coefficient,  $\beta$  = standardized regression coefficient, BS = between-subject effect, DBP = Diastolic blood pressure, HF = high frequency, HR = Heart rate, HRV = Heart rate variability, RMSSD = root mean square of the successive differences, SBP = Systolic blood pressure, SD = standard deviation, SDNN = standard deviation of NN intervals, SE = standard error, WS= Within-subject effect;<sup>1</sup> Higher values correspond to more stress. If higher values correspond to lower stress, those scale ranges will be marked by an asterisk; \* higher values correspond to lower stress

## References

1. Balducci C, Spagnoli P, Toderi S, Clark MA. A within-individual investigation on the relationship between day level workaholism and systolic blood pressure. *WORK AND STRESS*.
2. Bishop GD, Enkelmann HC, Tong EM, Why YP, Diong SM, Ang J, Khader M. Job demands, decisional control, and cardiovascular responses. *J Occup Health Psychol*. 2003;8:146-56.
3. Bowen KS, Uchino BN, Birmingham W, Carlisle M, Smith TW, Light KC. The stress-buffering effects of functional social support on ambulatory blood pressure. *Health Psychol*. 2014;33:1440-3.
4. Brondolo E, Rieppi R, Erickson SA, Bagiella E, Shapiro PA, McKinley P, Sloan RP. Hostility, interpersonal interactions, and ambulatory blood pressure. *Psychosom Med*. 2003;65:1003-11.
5. Buckley TC, Holohan D, Greif JL, Bedard M, Suvak M. Twenty-four-hour ambulatory assessment of heart rate and blood pressure in chronic PTSD and non-PTSD veterans. *J Trauma Stress*. 2004;17:163-71.
6. Carels RA, Cacciapaglia H, Perez-Benitez CI, Douglass O, Christie S, O'Brien WH. The association between emotional upset and cardiac arrhythmia during daily life. *J Consult Clin Psychol*. 2003;71:613-8.
7. Conley KM, Lehman BJ. Test anxiety and cardiovascular responses to daily academic stressors. *Stress Health*. 2012;28:41-50.
8. Dennis PA, Dedert EA, Van Voorhees EE, Watkins LL, Hayano J, Calhoun PS, Sherwood A, Dennis MF, Beckham JC. Examining the crux of autonomic dysfunction in posttraumatic stress disorder: Whether chronic or situational distress underlies elevated heart rate and attenuated heart rate variability. *Psychosom Med*. 2016;78:805-9.



9. Enkelmann HC, Bishop GD, Tong EM, Diong SM, Why YP, Khader M, Ang J. The relationship of hostility, negative affect and ethnicity to cardiovascular responses: an ambulatory study in Singapore. *Int J Psychophysio.* 2005;56:185-97.
10. French KA. Episodic work-family conflict and strain: A dynamic perspective (Doctoral dissertation, University of South Florida, Tampa, USA). 2017; Available from: <https://scholarcommons.usf.edu/etd/7399/>.
11. Gaggioli A, Pioggia G, Tartarisco G, Baldus G, Corda D, Cipresso P, Riva G. A mobile data collection platform for mental health research. *Pers Ubiquitous Comput.* 2013;17:241-51.
12. Gallo LC, Matthews KA. Adolescents' attachment orientation influences ambulatory blood pressure responses to everyday social interactions. *Psychosom Med.* 2006;68:253-61.
13. Hawkley LC, Burleson MH, Berntson GG, Cacioppo JT. Loneliness in everyday life: Cardiovascular activity, psychosocial context, and health behaviors. *J Pers Soc Psychol.* 2003;85:105-20.
14. Ilies R, Dimotakis N, De Pater IE. Psychological and physiological reactions to high workloads: Implications for well-being. *Pers Psychol.* 2010;63:407-36.
15. Johnston D, Bell C, Jones M, Farquharson B, Allan J, Schofield P, Ricketts I, Johnston M. Stressors, appraisal of stressors, experienced stress and cardiac response: A real-time, real-life investigation of work stress in nurses. *Ann Behav Med.* 2016;50:187-97.
16. Kamarck TW, Janicki DL, Shiffman S, Polk DE, Muldoon MF, Liebenauer LL, Schwartz JE. Psychosocial demands and ambulatory blood pressure: a field assessment approach. *Physiol Behav.* 2002;77:699-704.

17. Kamarck TW, Li X, Wright AG, Muldoon MF, Manuck SB. Ambulatory blood pressure reactivity as a moderator in the association between daily life psychosocial stress and carotid artery atherosclerosis. *Psychosom Med.* 2018;80:774-82.
18. Thomas MC, Kamarck TW, Li X, Erickson KI, Manuck SB. Physical activity moderates the effects of daily psychosocial stressors on ambulatory blood pressure. *Health Psychol.* 2019;38:925-35.
19. Kamarck TW, Shiffman SM, Smithline L, Goodie JL, Paty JA, Gnys M, Jong JY. Effects of task strain, social conflict, and emotional activation on ambulatory cardiovascular activity: daily life consequences of recurring stress in a multiethnic adult sample. *Health Psychol.* 1998;17:17-29.
20. Luecken LJ, Kraft A, Appelhans BM, Enders C. Emotional and cardiovascular sensitization to daily stress following childhood parental loss. *Dev Psychol.* 2009;45:296-302.
21. Lumley MA, Shi W, Wiholm C, Slatcher RB, Sandmark H, Wang S, Hytter A, Arnetz BB. The relationship of chronic and momentary work stress to cardiac reactivity in female managers: feasibility of a smart phone-assisted assessment system. *Psychosom Med.* 2014;76:512-8.
22. Määttänen I, Henttonen P, Valiaho J, Palomaki J, Thibault M, Kallio J, Mantyjärvi J, Harviainen T, Jokela M. Positive affect state is a good predictor of movement and stress: combining data from ESM/EMA, mobile HRV measurements and trait questionnaires. *Heliyon.* 2021;7:e06243.
23. Pieper S, Brosschot JF, van der Leeden R, Thayer JF. Cardiac effects of momentary assessed worry episodes and stressful events. *Psychosom Med.* 2007;69:901-9.
24. Pieper S, Brosschot JF, van der Leeden R, Thayer JF. Prolonged cardiac effects of momentary assessed stressful events and worry episodes. *Psychosom Med.* 2010;72:570-7.

25. Pollard TM, Pearce KL, Rousham EK, Schwartz JE. Do blood pressure and heart rate responses to perceived stress vary according to endogenous estrogen level in women? *Am J Phys Anthropol.* 2007;132:151-7.
26. Potter L. An ecological momentary investigation of weight stigma: Exploring associations between weight vigilance and poor health in everyday life (Doctoral dissertation, The Pennsylvania State University, Pennsylvania, USA). 2019; Available from: <https://etda.libraries.psu.edu/catalog/15843Inc5003>.
27. Schilling R, Herrmann C, Ludyga S, Colledge F, Brand S, Puhse U, Gerber M. Does Cardiorespiratory Fitness Buffer Stress Reactivity and Stress Recovery in Police Officers? A Real-Life Study. *FRONTIERS IN PSYCHIATRY.* 2020;11.
28. Schmid RF, Thomas J. Teachers' ambulatory heart rate variability as an outcome and moderating variable in the job demands-resources model. *ANXIETY STRESS AND COPING.* 2020;33:387-402.
29. Schwerdtfeger AR, Dick K. Episodes of momentary resilience in daily life are associated with HRV reductions to stressful operations in firefighters: An ambulatory assessment approach using bayesian multilevel modeling. *J Posit Psychol.* 2019;14:593-602.
30. Shockley KM, Allen TD. Episodic work-family conflict, cardiovascular indicators, and social support: An experience sampling approach. *J Occup Health Psychol.* 2013;18:262-75.
31. Simon SG, Sloan RP, Thayer JF, Jamner LD. Taking context to heart: Momentary emotions, menstrual cycle phase, and cardiac autonomic regulation. *PSYCHOPHYSIOLOGY.* 2021;58.

32. Smith PJ, Blumenthal JA, Babyak MA, Georgiades A, Sherwood A, Sketch MH, Jr., Watkins LL. Ventricular ectopy: impact of self-reported stress after myocardial infarction. *Am Heart J.* 2007;153:133-9.
33. Uchino BN, Berg CA, Smith TW, Pearce G, Skinner M. Age-related differences in ambulatory blood pressure during daily stress: evidence for greater blood pressure reactivity with age. *Psychol Aging.* 2006;21:231-9.
34. Wong JHK, Kelloway EK. What Happens at Work Stays at Work? Workplace Supervisory Social Interactions and Blood Pressure Outcomes. *J Occup Health Psychol.* 2016;21:133-41.
35. Wrzus C, Mueller V, Wagner GG, Lindenberger U, Riediger M. Affective and Cardiovascular Responding to Unpleasant Events From Adolescence to Old Age: Complexity of Events Matters. *Dev Psychol.* 2013;49:384-97.
