# Supplementary material for: Physiological reactions to acute stressors and subjective stress during daily life: A systematic review on ecological momentary assessment (EMA) studies
Source: PubMed Central journal article supplement (PMC9328558; doi:10.1371/journal.pone.0271996), 2022-07-27
Supplement: pone.0271996.s005.pdf [file pone.0271996.s005.pdf]

## S5 Table

**Article title:** Physiological reactions to acute stressors and subjective stress during daily life: A systematic review on ecological momentary assessment (EMA) studies

**Authors:** Jeannette Weber, Peter Angerer, Jennifer Apolinário-Hagen

Institute of Occupational-, Social- and Environmental Medicine, Centre for Health and Society, Medical Faculty, Heinrich-Heine-University Düsseldorf, Moorenstraße 5, 40225 Düsseldorf, Germany

**S5 Table. Description of studies examining within-subject associations between acute stress and other outcomes**

| Study                           | Study population and setting                                                                                   | Exposure variable (scale range <sup>1</sup> )                                                                               | Sampling schedule per participant <sup>2</sup>                                 | Max. time lag between exposure and outcome            | Results (direct association between exposure and outcome)                                                                                                                                                                                                                                                                                                       |
|---------------------------------|----------------------------------------------------------------------------------------------------------------|-----------------------------------------------------------------------------------------------------------------------------|--------------------------------------------------------------------------------|-------------------------------------------------------|-----------------------------------------------------------------------------------------------------------------------------------------------------------------------------------------------------------------------------------------------------------------------------------------------------------------------------------------------------------------|
| <b>Benjamin, 2021 (1)</b>       | 44 adolescents with type I diabetes in the US; M <sub>age</sub> = 15.4 (SD=1.05, range 13-17); female: 68%     | Severity of acute general stressors (scale range: 1-5)<br>Severity of acute stressors regarding diabetes (scale range: 1-5) | 7 days;<br>Exposure: daily<br>Outcome: >5 times/day                            | same day                                              | <u>Blood glucose:</u> No association with severity of acute general stressors (WS: b=5.54, SE=5.86, p>.05; BS: b=18.76, SE=11.06, p>.05) and positive association with severity of acute stressors regarding diabetes (WS: b=9.44, SE=4.50, p<.05; BS: b=12.79, SE=10.07, p>.05)                                                                                |
| <b>Berg et al., 2020 (2)</b>    | 199 patients with type I diabetes in the US; M <sub>age</sub> = 46.81 (SD=13.95, range 25.9–74.9); female: 52% | Number of acute general stressors (scale range: 0-1)<br>Number of acute stressors regarding diabetes (scale range: 0-1)     | 14 days;<br>Exposure: daily<br>Outcome: dependent on regular measurement times | Same day                                              | <u>Blood glucose:</u> No association with number of acute general stressors (WS: b=2.66, SE=5.68, p>.05; between-person: b=-26.83, SE=28.88, p>.05) and positive association with number of acute stressors regarding diabetes (WS: b=67.01, SE=6.28, p>.001; BS: b=82.09, SE=21.64, p>.001, in this model interactions with age and comorbidity were included) |
| <b>Birditt et al., 2018 (3)</b> | 89 middle-aged to old adults in the US; M <sub>age</sub> =67.72                                                | Number of acute stressors regarding social interactions                                                                     | 5 days;<br>Exposure: daily<br>Outcome: 4 times/day                             | Overall levels per day, wake-evening slope: same day; | <u>Overall salivary alpha-amylase levels per day<sup>1</sup>:</u> No association at same day (WS: b=0.036, SE=0.04, p<.05) and previous day (WS: b=0.014, SE=0.04, p<.05)<br><u>Next-day awakening response of salivary alpha-amylase<sup>1</sup>:</u> No association                                                                                           |

|                                           |                                                                                                                               |                                                                                                                                        |                                                               |                                           |                                                                                                                                                                                                                                                                                                                                                                                                                                                                                                                                                                                                                                                                                                                                                                                                                                                                                                                                                                                                                                                                                                                                                                                                                                                                                                                        |
|-------------------------------------------|-------------------------------------------------------------------------------------------------------------------------------|----------------------------------------------------------------------------------------------------------------------------------------|---------------------------------------------------------------|-------------------------------------------|------------------------------------------------------------------------------------------------------------------------------------------------------------------------------------------------------------------------------------------------------------------------------------------------------------------------------------------------------------------------------------------------------------------------------------------------------------------------------------------------------------------------------------------------------------------------------------------------------------------------------------------------------------------------------------------------------------------------------------------------------------------------------------------------------------------------------------------------------------------------------------------------------------------------------------------------------------------------------------------------------------------------------------------------------------------------------------------------------------------------------------------------------------------------------------------------------------------------------------------------------------------------------------------------------------------------|
|                                           | (SD=14.43, range 40-95); female: 55%                                                                                          | (scale range: 0-10)                                                                                                                    |                                                               | Next-day awakening response: previous day | (WS: b=0.074, SE=0.10, p<.05)<br><u>Wake-evening slope of salivary alpha-amylase<sup>1</sup></u> : No association at same day (WS: b=-0.005, SE=0.00, p<.05) or previous day (WS: b=0.001, SE=0.00, p<.05)                                                                                                                                                                                                                                                                                                                                                                                                                                                                                                                                                                                                                                                                                                                                                                                                                                                                                                                                                                                                                                                                                                             |
| <b>Clark et al., 1995 (4)</b>             | 72 persons with tension-type headaches and non-headache controls in the US; M <sub>age</sub> =23.5 (range 18-36); female: 83% | Global subjective stress (scale range: 0-100)                                                                                          | 3 days; every 30 minutes                                      | 30 minutes                                | <u>Temporalis muscle activity</u> : No significant correlation (p>.05)                                                                                                                                                                                                                                                                                                                                                                                                                                                                                                                                                                                                                                                                                                                                                                                                                                                                                                                                                                                                                                                                                                                                                                                                                                                 |
| <b>Geisser et al., 1995 (5)</b>           | 21 participants with chronic low back pain in the US; M <sub>age</sub> =35.1 (range: 21-59); female: 57%                      | Global subjective stress (scale range: 1-8)                                                                                            | 3 days; Exposure: every 30 minutes<br>Outcome: continuously   | concurrent                                | <u>Electromyographic activity</u> : No association (p>.05)                                                                                                                                                                                                                                                                                                                                                                                                                                                                                                                                                                                                                                                                                                                                                                                                                                                                                                                                                                                                                                                                                                                                                                                                                                                             |
| <b>Jelsma et al., 2021 (6)</b>            | 100 college students of racial and ethnic minorities in the US; M <sub>age</sub> = 20.4 (SD=2.06, range 18-31); female: 61%   | Occurrence of acute stressors regarding discrimination (dichotomous scale)                                                             | 1 or 2 weeks; Exposure: 2 times/day<br>Outcomes: continuously | concurrent                                | <u>Electrodermal activity – sudomotor neuron activity</u> : positive association (WS B=0.17, SE=0.45, p<.001)                                                                                                                                                                                                                                                                                                                                                                                                                                                                                                                                                                                                                                                                                                                                                                                                                                                                                                                                                                                                                                                                                                                                                                                                          |
| <b>Liu et al., 2017/ Liu, 2017 (7, 8)</b> | 165 family caregivers in the US; M <sub>age</sub> = 61.99 (SD=10.70, range 39-89); female: 88%                                | Number of acute stressors in caregiving (scale range: 0-19);<br>Number of acute stressors not related to caregiving (scale range: 0-8) | 8 days; Exposure: daily<br>Outcome: 5 times/day               | Same day                                  | <u>Slope of salivary alpha-amylase levels between 30 minutes after wake-up and before lunch</u> : Negative association with care-related stressors (WS: b=-0.36, SE=0.18, p=.048; BS: b=-0.31, SE=0.17, p>.05)<br><u>Slope of salivary alpha-amylase levels between before lunch and late afternoon</u> : No association with care-related stressors (WS: b=-0.33, SE=0.24, p>.05; BS: b=-0.18, SE=0.18, p>.05)<br><u>Slope of salivary alpha-amylase levels between late afternoon and before bed</u> : Positive association with care-related stressors (WS: b=0.17, SE=0.08, p=.03; BS: b=0.17, SE=0.06, p<.01)<br><u>Salivary alpha-amylase levels before lunch</u> : No association with care-related stressors (WS: b=-0.39, SE=0.70, p>.05; BS: b=-0.90, SE=1.20, p>.05) or non-care-related stressors (WS: b=2.41, SE=2.57, p>.05; BS: b=-4.59, SE=7.30, p>.05)<br><u>Salivary alpha-amylase levels at late afternoon</u> : Negative association with care-related stressors (WS: b=-1.95, SE=0.77, p<.05; BS: b=-1.60, SE=1.22, p>.05). No association with non-care-related stressors (WS: b=-1.49, SE=2.84, p>.05; BS: b=-7.24, SE=7.42, p>.05)<br><u>Salivary alpha-amylase levels before bed</u> : No association with care-related stressors (WS: b=0.20, SE=0.84, p>.05; BS: b=0.48, SE=1.16, p>.05) or |

|                                   |                                                                                                                            |                                                                                                                                                                                                                                                     |                                              |                                                                                         |                                                                                                                                                                                                                                                                                                                                                                                                                                                                                                                                                                                                                                                                                                                                                                                                                                                                                        |
|-----------------------------------|----------------------------------------------------------------------------------------------------------------------------|-----------------------------------------------------------------------------------------------------------------------------------------------------------------------------------------------------------------------------------------------------|----------------------------------------------|-----------------------------------------------------------------------------------------|----------------------------------------------------------------------------------------------------------------------------------------------------------------------------------------------------------------------------------------------------------------------------------------------------------------------------------------------------------------------------------------------------------------------------------------------------------------------------------------------------------------------------------------------------------------------------------------------------------------------------------------------------------------------------------------------------------------------------------------------------------------------------------------------------------------------------------------------------------------------------------------|
|                                   |                                                                                                                            |                                                                                                                                                                                                                                                     |                                              |                                                                                         | non-care-related stressors (WS: $b=2.63$ , $SE=3.09$ , $p>.05$ ; BS: $b=-8.17$ , $SE=7.07$ , $p>.05$ )<br><u>AUCg curve of salivary alpha-amylase levels:</u> No association with care-related stressors (WS: $b=-0.35$ , $SE=0.44$ , $p>.05$ ; BS: $b=-0.31$ , $SE=1.01$ , $p>.05$ ) or non-care-related stressors (WS: $b=-0.29$ , $SE=1.61$ , $p>.05$ ; BS: $b=-6.93$ , $SE=6.06$ , $p>.05$ )                                                                                                                                                                                                                                                                                                                                                                                                                                                                                       |
| <b>Nater et al., 2007 (9)</b>     | 76 university students in Germany; $M_{age}=26.7$ ( $SD=8.8$ , range 18-58); female: 58%                                   | Global subjective stress (scale range: 1-5)                                                                                                                                                                                                         | 1 day; 15 times/day                          | 1 hour                                                                                  | <u>Current salivary alpha-amylase levels:</u> No association ( $p>.05$ )                                                                                                                                                                                                                                                                                                                                                                                                                                                                                                                                                                                                                                                                                                                                                                                                               |
| <b>Polenick et al., 2021 (10)</b> | 93 middle-aged to old adults in the US; $M_{age}=67.77$ ( $SD=14.57$ , range 40-95)                                        | Number of acute stressors regarding social interactions (scale range: 0-10)                                                                                                                                                                         | 5 days; exposure: daily outcome: 4 times/day | Overall levels, wake-evening slope: same day; Next-day awakening response: previous day | <u>Overall DHEA-S levels per day:</u> No association at same day ( $b=-0.027$ , $SE=0.03$ , $p>.05$ ) or previous day ( $b=0.062$ , $SE=0.03$ , $p>.05$ )<br><u>Next-day awakening response of DHEA-S:</u> No association (WS: $b=0.111$ , $SE=0.10$ , $p>.05$ )<br><u>Wake-Evening Slope of DHEA-S:</u> No association with same day (WS: $b=0.002$ , $SE=0.00$ , $p>.05$ ) or previous day (WS: $b=0.001$ , $SE=0.00$ , $p>.05$ )                                                                                                                                                                                                                                                                                                                                                                                                                                                    |
| <b>Pollard et al., 1996 (11)</b>  | 104 participants in UK; Male: 49%, $M_{age}=38.0$ ( $SD=7.53$ ); female: 51%, $M_{age}=37.9$ ( $SD=7.00$ )                 | Severity of acute stressors at work: job demands (scale range: 1-5)                                                                                                                                                                                 | 3 days; daily                                | Same day                                                                                | <u>Urinary levels of adrenaline:</u> No association in women. Positive association in men ( $b=0.01$ , $p=0.04$ , $F=4.03$ ).                                                                                                                                                                                                                                                                                                                                                                                                                                                                                                                                                                                                                                                                                                                                                          |
| <b>Savla et al., 2013 (12)</b>    | 28 spouse care partners of individuals with mild cognitive impairment in the US; $M_{age}=72.9$ ( $SD=6.82$ ); female: 90% | Occurrence of any acute stressor in caregiving: Memory- and behavior related problems of spouse - restless behavior, mood disturbances, memory-related problems; Severity of acute stressors regarding social interactions (dichotomous scale: 0/1) | 4 days; exposure: daily outcome: 5 times/day | Same day                                                                                | <u>Diurnal slope of salivary alpha-amylase:</u> Restless behavior was associated with a steeper decline throughout the day (main effect: $b=-1.50$ , $SE=0.65$ , $p<.05$ ; interaction effect with daily decline of alpha-Amylase: $b=-0.02$ , $SE=0.06$ , $p>.10$ ). No association with mood-related problems (main effect: $b=0.83$ , $SE=0.53$ , $p>.10$ ; interaction effect with daily decline of alpha-Amylase: $b=0.03$ , $SE=0.06$ , $p>.10$ ) or memory-related problems (main effect: $b=0.20$ , $SE=0.45$ , $p>.10$ ; interaction effect with daily decline of alpha-Amylase: $b=-0.03$ , $SE=0.06$ , $p>.10$ ). Severity of acute stressors regarding social interactions was association with flatter decline of alpha-Amylase (main effect: $b=0.67$ , $SE=0.44$ , $p>.10$ ; interaction effect with daily decline of alpha-Amylase: $b=-0.12$ , $SE=0.05$ , $p<.05$ ). |
| <b>Stoffel</b>                    | 60 working adults                                                                                                          | Severity of acute                                                                                                                                                                                                                                   | 4 days;                                      | 6                                                                                       | Current levels: <u>Current salivary alpha-amylase:</u> No association with severity of acute                                                                                                                                                                                                                                                                                                                                                                                                                                                                                                                                                                                                                                                                                                                                                                                           |

|                                  |                                                                                                        |                                                                                                                |                                               |                                    |                                                                                                                                                                                                                                                                                                                                                                                         |
|----------------------------------|--------------------------------------------------------------------------------------------------------|----------------------------------------------------------------------------------------------------------------|-----------------------------------------------|------------------------------------|-----------------------------------------------------------------------------------------------------------------------------------------------------------------------------------------------------------------------------------------------------------------------------------------------------------------------------------------------------------------------------------------|
| <b>et al., 2021 (13)</b>         | in Germany; $M_{age}= 36.172$ (SD=11.611, range 19-60); female: 33%                                    | stressors regarding social interactions (scale range: 1-100*)<br>Global subjective stress (scale range: 1-100) | times/day                                     | 5.5 hour; average levels: same day | stressors regarding social interactions (WS: $b=-0.003$ , SE= 0.002, $p = 0.070$ , BS: $b=0.019$ , SE= 0.010, $p=0.061$ ) or global subjective stress (WS: $p>.05$ )<br><u>Average salivary alpha-amylase levels/day</u> : No association with severity of acute stressors regarding social interactions (WS: $b=0.002$ , SE=0.003, $p=0.488$ ) or global subjective stress ( $p>.05$ ) |
| <b>Timmons et al., 2019 (14)</b> | 218 participants in partnership at home in the US; $M_{age}= 23.1$ (SD=3.0, range: 18-25); female: 50% | Severity of acute stressors regarding social interactions (scale range: 0-10)                                  | 1 day; Exposure: hourly Outcome: continuously | concurrent                         | <u>Electrodermal activity</u> : No association (WS: $b=-0.02$ , $p=.15$ )                                                                                                                                                                                                                                                                                                               |

**Notes.** Abbreviations:  $b$ = unstandardized regression coefficient,  $\beta$  = standardized regression coefficient, BS = between-subject effect, DHEA-S = Dehydroepiandrosterone sulfate, SD = standard deviation, SE = standard error, WS= Within-subject effect; <sup>1</sup>Higher values correspond to more stress. If higher values correspond to lower stress, those scale ranges will be marked by an asterisk; \* higher values correspond to lower stress; <sup>1</sup> salivary alpha-amylase levels (U/ml) were log-transformed

## References

1. Benjamin NE. Ecological momentary assessment of anxiety, daily stress, and daily glycemic control in adolescents with type 1 diabetes: Dissertation Abstracts International: Section B: The Sciences and Engineering. Vol.82(8-B),2021, pp. No Pagination Specified.; 2021.
2. Berg CA, Helgeson VS, Kelly CS, Tracy EL, Litchman ML, Butner JE. Age Differences in Reactivity to Daily General and Type 1 Diabetes Stressors. PSYCHOLOGY AND AGING. 2020;35:1115-26.
3. Birditt KS, Tighe LA, Nevitt MR, Zarit SH. Daily social interactions and the biological stress response: Are there age differences in links between social interactions and alpha-amylase? Gerontologist. 2018;58:1114-25.
4. Clark G, Sakai S, Merrill R, Flack V, McCreary C. Cross-correlation between stress, pain, physical activity, and temporalis muscle EMG in tension-type headache. Cephalalgia. 1995;15:511-8.
5. Geisser ME, Robinson ME, Richardson C. A time series analysis of the relationship between ambulatory EMG, pain, and stress in chronic low back pain. Biofeedback Self Regul. 1995;20:339-55.
6. Jelsma EB, Goosby BJ, Cheadle JE. Do trait psychological characteristics moderate sympathetic arousal to racial discrimination exposure in a natural setting? [References]: Psychophysiology. Vol.58(4), 2021, ArtID e13763.; 2021.
7. Liu Y, Granger DA, Kim K, Klein LC, Almeida DM, Zarit SH. Diurnal salivary alpha-amylase dynamics among dementia family caregivers. Health Psychol. 2017;36:160-8.

8. Liu Y. Aging, caregiving, health and well-being (Doctoral dissertation, The Pennsylvania State University, Pennsylvania, USA). 2017; Available from: [https://etda.libraries.psu.edu/files/final\\_submissions/11686](https://etda.libraries.psu.edu/files/final_submissions/11686).
9. Nater UM, Rohleder N, Schlotz W, Ehlert U, Kirschbaum C. Determinants of the diurnal course of salivary alpha-amylase. *Psychoneuroendocrinology*. 2007;32:392-401.
10. Polenick CA, Birditt KS, Turkelson A, Perbix EA, Salwi SM, Zarit SH. Daily Social Interactions and HPA Axis Activity Among Midlife and Older Adults. *Gerontologist*. 2021;61:897-906.
11. Pollard TM, Ungpakorn G, Harrison GA, Parkes KR. Epinephrine and cortisol responses to work: A test of the models of Frankenhaeuser and Karasek. *Ann Behav Med*. 1996;18:229-37.
12. Savla J, Granger DA, Roberto KA, Davey A, Blieszner R, Gwazdauskas F. Cortisol, alpha amylase, and daily stressors in spouses of persons with mild cognitive impairment. *Psychol Aging*. 2013;28:666-79.
13. Stoffel M, Abbruzzese E, Rahn S, Bossmann U, Moessner M, Ditzen B. Covariation of psychobiological stress regulation with valence and quantity of social interactions in everyday life: disentangling intra- and interindividual sources of variation. *JOURNAL OF NEURAL TRANSMISSION*. 2021;128:1381-95.
14. Timmons AC, Han SC, Chaspari T, Kim Y, Pettit C, Narayanan S, Margolin G. Family-of-origin aggression, dating aggression, and physiological stress reactivity in daily life. *Physiol Behav*. 2019;206:85-92.
