# Supplementary material for: Physiological reactions to acute stressors and subjective stress during daily life: A systematic review on ecological momentary assessment (EMA) studies
Source: PubMed Central journal article supplement (PMC9328558; doi:10.1371/journal.pone.0271996), 2022-07-27
Supplement: pone.0271996.s006.pdf [file pone.0271996.s006.pdf]

## S6 Table

**Article title:** Physiological reactions to acute stressors and subjective stress during daily life: A systematic review on ecological momentary assessment (EMA) studies

**Authors:** Jeannette Weber, Peter Angerer, Jennifer Apolinário-Hagen

Institute of Occupational-, Social- and Environmental Medicine, Centre for Health and Society, Medical Faculty, Heinrich-Heine-University Düsseldorf, Moorenstraße 5, 40225 Düsseldorf, Germany

**S6 Table Quality assessment**

| Study                      | Measurement frequency: at least 3 times per day | Compliance | Recall bias      | Confounding     | Validity and reliability of exposure |
|----------------------------|-------------------------------------------------|------------|------------------|-----------------|--------------------------------------|
| Almeida et al. 2016 [1]    | no                                              | NA         | moderate         | moderate        | partly                               |
| Bai et al. 2017 [2]        | no                                              | yes        | moderate         | low to moderate | partly                               |
| Balducci et al. 2021 [3]   | no                                              | yes        | high             | moderate        | yes                                  |
| Barker et al. 2012 [4]     | no                                              | NA         | moderate         | moderate        | no to partly                         |
| Benjamin 2021 [5]          | no                                              | yes        | moderate to high | moderate        | no to partly                         |
| Berg et al. 2020           | no                                              | yes        | moderate to high | low             | no to partly                         |
| Bernstein et al. 2018 [6]  | yes                                             | yes        | low              | moderate        | no                                   |
| Birditt et al. 2015 [7]    | no                                              | yes        | moderate         | moderate        | NA                                   |
| Birditt et al. 2016 [8]    | no                                              | yes        | moderate         | low to moderate | NA                                   |
| Birditt et al. 2017 [9]    | no                                              | yes        | moderate         | low             | NA                                   |
| Birditt et al. 2018 [10]   | no                                              | yes        | moderate         | low to moderate | NA                                   |
| Bishop et al. 2003 [11]    | yes                                             | no         | low              | low             | partly                               |
| Bowen et al. 2014 [12]     | yes                                             | NA         | low              | low to moderate | NA                                   |
| Brondolo et al. 2003 [13]  | yes                                             | yes        | moderate         | low to moderate | partly                               |
| Buckley et al. 2004 [14]   | yes                                             | NA         | low to moderate  | low             | no                                   |
| Carels et al. 2003 [15]    | yes                                             | NA         | low to moderate  | moderate        | yes                                  |
| Clark et al. 1995 [16]     | yes                                             | NA         | moderate         | high            | no                                   |
| Collip et al. 2011 [17]    | yes                                             | no         | high             | low to moderate | no                                   |
| Conley & Lehman 2012 [18]  | partly                                          | NA         | moderate to high | moderate        | partly                               |
| Costanzo et al. 2012 [19]  | no                                              | NA         | moderate         | moderate        | no                                   |
| Crockett & Neff 2013 [20]  | no                                              | NA         | moderate to high | low             | no                                   |
| Damaske et al. 2016 [21]   | yes                                             | yes        | low              | moderate        | partly to yes                        |
| Dennis et al. 2016 [22]    | NA                                              | NA         | moderate         | moderate        | no                                   |
| Enkelmann et al. 2005 [23] | yes                                             | no         | low              | low             | partly                               |
| Fischer et al. 2016 [24]   | yes                                             | yes        | low              | moderate        | no                                   |
| French 2017 [25]           | yes                                             | yes        | moderate         | moderate        | no                                   |
| Gaggioli et al. 2013 [26]  | yes                                             | yes        | low              | high            | no to partly                         |
| Gallo et al. 2006 [27]     | yes                                             | NA         | low to moderate  | low             | no                                   |
| Gartland et al. 2014 [28]  | No                                              | NA         | moderate to high | low             | partly                               |
| Geisser et al. 1995 [29]   | yes                                             | NA         | moderate         | high            | no                                   |

|                                                |                  |     |          |                 |               |
|------------------------------------------------|------------------|-----|----------|-----------------|---------------|
| Han et al. 2018 [30]                           | No               | NA  | moderate | moderate        | No to partly  |
| Hanson et al. 2000 [31]                        | yes              | yes | moderate | moderate        | partly        |
| Hanson & Chen 2010 [32]                        | No               | yes | moderate | moderate        | no to partly  |
| Hartley et al. 2019 [33]                       | No               | NA  | moderate | moderate        | no            |
| Hartley et al. 2012 [34]                       | No               | NA  | moderate | moderate        | no to partly  |
| Havermans et al. 2011 [35]                     | yes              | yes | high     | low to moderate | no            |
| Hawkey et al. 2003 [36]                        | yes              | yes | moderate | low             | no            |
| Heissel et al. 2018 [37]                       | No               | NA  | low      | moderate        | partly to yes |
| Hoppmann et al. 2006 [38]                      |                  |     | moderate | to              |               |
|                                                | yes              | yes | high     | low to moderate | NA            |
| Ilies et al. 2010 [39]                         | Yes <sup>1</sup> | no  | low      | moderate        | yes           |
| Jacobs et al. 2007 [40]                        | yes              | no  | moderate | low to moderate | no            |
| Jelsma., 2021 [41]                             | no               | yes | moderate | moderate        | partly        |
| Johnson et al. 2021 [42]                       | yes              | yes | low      | low to moderate | no to partly  |
| Johnston et al. 2016 [43]                      | yes              | yes | low      | moderate        | yes           |
| Kalpajian et al. 2009 [44]                     | yes              | yes | moderate | moderate        | no            |
| Kamarck et al. 2002 [45]                       | yes              | yes | low      | low             | yes           |
| Kamarck et al. 2018/Thomas et al. 2019 [46,47] | yes              | NA  | low      | low             | yes           |
| Kamarck et al. 1998 [48]                       | yes              | yes | low      | low to moderate | yes           |
| Keneski et al. 2018 [49]                       |                  |     | moderate | to              |               |
|                                                | No               | NA  | high     | low             | no            |
| Lazarides et al. 2020                          | yes              | yes | low      | moderate        | no to partly  |
| Linz et al. 2018 [50]                          | yes              | yes | moderate | low to moderate | no            |
| Lippold et al. 2016 [51]                       | No               | yes | moderate | moderate        | no to partly  |
| Lippold et al. 2016 [52]                       | No               | yes | moderate | moderate        | no            |
| Liu et al. 2017/Liu 2017 [53,54]               | No               | yes | moderate | moderate        | partly        |
| Liu et al. 2018/ Liu 2017 [54,55]              | No               | yes | moderate | moderate        | partly        |
| Lee et al. 2019 [56]                           | No               | NA  | moderate | low to moderate | partly        |
| Luecken et al. 2009 [57]                       | yes              | yes | low      | low to moderate | no            |
| Lumley et al. 2014 [58]                        | yes              | yes | low      | low to moderate | no            |
| Määttänen et al. 2021 [59]                     | yes              | NA  | moderate | moderate        | no            |
| Nater et al. 2007 [60]                         |                  |     | moderate | to              |               |
|                                                | yes              | NA  | high     | low             | no            |
| O'Connor et al. 2020 [61]                      | No               | yes | moderate | low             | no to partly  |
| Peeters et al. 2003 [62]                       | yes              | no  | high     | low to moderate | no            |
| Pieper et al. 2007/2010 [63,64]                | yes              | NA  | moderate | moderate        | no            |
| Poleninck et al. 2021 [65]                     | no               | yes | moderate | low             | NA            |
| Pollard et al. 1996 [66]                       | No               | NA  | high     | moderate        | yes           |
| Pollard et al. 2007 [67]                       | yes              | yes | high     | low to moderate | no            |
| Potter 2019 [68]                               | yes              | no  | low      | moderate        | no            |
| Proulx 2015 [69]                               | No               | NA  | high     | moderate        | No to partly  |
| Qu et al. 2020 [70]                            | no               | NA  | high     | moderate        | no            |
| Savla et al. 2013 [71]                         | No               | yes | moderate | moderate        | partly to yes |
| Savla et al. 2011 [72]                         | No               | yes | moderate | moderate        | partly to yes |
| Savla et al. 2018 [73]                         | No               | NA  | moderate | moderate        | No to partly  |
| Saxbe et al. 2008 [74]                         | No               | NA  | high     | moderate        | yes           |
| Schilling et al. 2020 [75]                     | yes              | yes | low      | moderate        | no            |
| Schlotz et al. 2006 [76]                       | yes              | yes | moderate | moderate        | no            |
| Schmid & Thomas, 2020 [77]                     | yes              | yes | moderate | low to moderate | no to partly  |
| Schwerdtfeger & Dick 2019 [78]                 | yes              | NA  | low      | to              |               |
|                                                | yes              | NA  | moderate | moderate        | no            |
| Seaton et al. 2021 [79]                        |                  |     | moderate | to              |               |
|                                                | no               | yes | high     | moderate        | yes           |
| Seltzer et al. 2010 [80]                       | No               | NA  | moderate | moderate        | yes           |
| Shockley et al. 2013 [81]                      | yes              | yes | high     | moderate        | no to partly  |
| Simon et al. 2020 [82]                         | yes              | yes | low      | low to moderate | no            |
| Sladek et al. 2019 [83]                        | yes              | yes | moderate | low to moderate | no            |
| Sladek et al. 2016 [84]                        | yes              | yes | high     | low to moderate | partly        |
| Sladek et al. 2020 [85]                        | No               | yes | moderate | low to moderate | no            |
| Slatcher et al. 2010 [86]                      | No               | NA  | high     | moderate        | partly        |

|                             |                  |     |          |    |                 |              |
|-----------------------------|------------------|-----|----------|----|-----------------|--------------|
| Smith et al. 2007 [87]      | yes              | NA  | moderate |    | moderate        | no           |
| Smyth et al. 1998 [88]      |                  |     | low      | to |                 |              |
|                             | yes              | yes | moderate |    | moderate        | no           |
| Smyth et al. 2017 [89]      | yes              | yes | moderate |    | low to moderate | no           |
| Stawski et al. 2013 [90]    | No               | yes | moderate |    | moderate        | No to partly |
| Stoffel et al. 2021 [91]    |                  |     | low      | to |                 |              |
|                             | yes              | yes | moderate |    | low             | no           |
| Timmons et al 2019 [92]     | yes              | yes | moderate |    | low to moderate | no           |
| Uchino et al. 2006 [93]     | yes              | NA  | moderate |    | low to moderate | no           |
| Vaessen et al. 2018 [94]    |                  |     | low      | to |                 |              |
|                             | yes              | NA  | moderate |    | moderate        | no           |
| van Eck et al. 1996 [95]    | yes              | yes | high     |    | low to moderate | partly       |
| van der Linden et al. 2021  | yes              | no  | low      |    | moderate        | partly       |
| van Duin et al. 2019 [96]   | yes              | no  | low      |    | low to moderate | no           |
| Volmer & Fritsche 2016 [97] | yes <sup>1</sup> | NA  | moderate |    | low to moderate | no           |
| Wong et al. 2014 [98]       | No               | NA  | moderate |    | moderate        | No to partly |
| Wong et al. 2012 [99]       | No               | yes | moderate |    | moderate        | No to partly |
| Wong & Shobo 2016 [100]     | No               | NA  | moderate |    | moderate        | No to partly |
| Wong & Shobo 2017 [101]     | No               | NA  | moderate |    | moderate        | No to partly |
| Wong & Kelloway 2016 [102]  | yes              | NA  | moderate |    | low to moderate | no           |
| Wright et al. 2021 [103]    | yes              | NA  | low      |    | moderate        | no           |
| Wrzus et al. 2013 [104]     | yes              | no  | moderate |    | moderate        | no           |

**Notes:** Abbreviation: NA = not available; <sup>1</sup> data was subsequently aggregated per day

## References

1. Almeida DM, Davis KD, Lee S, Lawson KM, Walter K, et al. (2016) Supervisor Support Buffers Daily Psychological and Physiological Reactivity to Work-to-Family Conflict. *J Marriage Fam* 78: 165-179.
2. Bai S, Robles TF, Reynolds BM, Repetti RL (2017) Children's diurnal cortisol responses to negative events at school and home. *Psychoneuroendocrinology* 83: 150-158.
3. Balducci C, Spagnoli P, Toderi S, Clark MA A within-individual investigation on the relationship between day level workaholism and systolic blood pressure. *WORK AND STRESS*.
4. Barker ET, Greenberg JS, Seltzer MM, Almeida DM (2012) Daily Stress and Cortisol Patterns in Parents of Adult Children With a Serious Mental Illness. *Health Psychol* 31: 130-134.
5. Benjamin NE (2021) Ecological momentary assessment of anxiety, daily stress, and daily glycemic control in adolescents with type 1 diabetes: Dissertation Abstracts International: Section B: The Sciences and Engineering. Vol.82(8-B),2021, pp. No Pagination Specified.
6. Bernstein MJ, Zawadzki MJ, Juth V, Benfield JA, Smyth JM (2018) Social interactions in daily life: Within-person associations between momentary social experiences and psychological and physical health indicators. *J Soc Pers Relat* 35: 372-394.
7. Birditt KS, Nevitt MR, Almeida DM (2015) Daily interpersonal coping strategies: Implications for self-reported well-being and cortisol. *J Soc Pers Relat* 32: 687-706.

8. Birditt KS, Kim K, Zarit SH, Fingerman KL, Loving TJ (2016) Daily interactions in the parent-adult child tie: Links between children's problems and parents' diurnal cortisol rhythms. *Psychoneuroendocrinology* 63: 208-216.
9. Birditt KS, Manalel JA, Kim K, Zarit SH, Fingerman KL (2017) Daily interactions with aging parents and adult children: Associations with negative affect and diurnal cortisol. *J Fam Psychol* 31: 699-709.
10. Birditt KS, Tighe LA, Nevitt MR, Zarit SH (2018) Daily social interactions and the biological stress response: Are there age differences in links between social interactions and alpha-amylase? *Gerontologist* 58: 1114-1125.
11. Bishop GD, Enkelmann HC, Tong EM, Why YP, Diong SM, et al. (2003) Job demands, decisional control, and cardiovascular responses. *J Occup Health Psychol* 8: 146-156.
12. Bowen KS, Uchino BN, Birmingham W, Carlisle M, Smith TW, et al. (2014) The stress-buffering effects of functional social support on ambulatory blood pressure. *Health Psychol* 33: 1440-1443.
13. Brondolo E, Rieppi R, Erickson SA, Bagiella E, Shapiro PA, et al. (2003) Hostility, interpersonal interactions, and ambulatory blood pressure. *Psychosom Med* 65: 1003-1011.
14. Buckley TC, Holohan D, Greif JL, Bedard M, Suvak M (2004) Twenty-four-hour ambulatory assessment of heart rate and blood pressure in chronic PTSD and non-PTSD veterans. *J Trauma Stress* 17: 163-171.
15. Carels RA, Cacciapaglia H, Perez-Benitez CI, Douglass O, Christie S, et al. (2003) The association between emotional upset and cardiac arrhythmia during daily life. *J Consult Clin Psychol* 71: 613-618.

16. Clark G, Sakai S, Merrill R, Flack V, McCreary C (1995) Cross-correlation between stress, pain, physical activity, and temporalis muscle EMG in tension-type headache. *Cephalalgia* 15: 511-518.
17. Collip D, Nicolson N, Lardinois M, Lataster T, van Os J, et al. (2011) Daily cortisol, stress reactivity and psychotic experiences in individuals at above average genetic risk for psychosis. *Psychol Med* 41: 2305-2315.
18. Conley KM, Lehman BJ (2012) Test anxiety and cardiovascular responses to daily academic stressors. *Stress Health* 28: 41-50.
19. Costanzo ES, Stawski RS, Ryff CD, Coe CL, Almeida DM (2012) Cancer survivors' responses to daily stressors: Implications for quality of life. *Health Psychol* 31: 360-370.
20. Crockett EE, Neff LA (2013) When receiving help hurts: Gender differences in diurnal cortisol responses to spousal support. *Soc Psychol Personal Sci* 4: 190-197.
21. Damaske S, Zawadzki MJ, Smyth JM (2016) Stress at work: Differential experiences of high versus low SES workers. *Soc Sci Med* 156: 125-133.
22. Dennis PA, Dedert EA, Van Voorhees EE, Watkins LL, Hayano J, et al. (2016) Examining the crux of autonomic dysfunction in posttraumatic stress disorder: Whether chronic or situational distress underlies elevated heart rate and attenuated heart rate variability. *Psychosom Med* 78: 805-809.
23. Enkelmann HC, Bishop GD, Tong EM, Diong SM, Why YP, et al. (2005) The relationship of hostility, negative affect and ethnicity to cardiovascular responses: an ambulatory study in Singapore. *Int J Psychophysio* 56: 185-197.

24. Fischer S, Doerr JM, Strahler J, Mewes R, Thieme K, et al. (2016) Stress exacerbates pain in the everyday lives of women with fibromyalgia syndrome--The role of cortisol and alpha-amylase. *Psychoneuroendocrinology* 63: 68-77.
25. French KA (2017) Episodic work-family conflict and strain: A dynamic perspective (Doctoral dissertation, University of South Florida, Tampa, USA).
26. Gaggioli A, Pioggia G, Tartarisco G, Baldus G, Corda D, et al. (2013) A mobile data collection platform for mental health research. *Pers Ubiquitous Comput* 17: 241-251.
27. Gallo LC, Matthews KA (2006) Adolescents' attachment orientation influences ambulatory blood pressure responses to everyday social interactions. *Psychosom Med* 68: 253-261.
28. Gartland N, O'Connor DB, Lawton R, Bristow M (2014) Exploring day-to-day dynamics of daily stressor appraisals, physical symptoms and the cortisol awakening response. *Psychoneuroendocrinology* 50: 130-138.
29. Geisser ME, Robinson ME, Richardson C (1995) A time series analysis of the relationship between ambulatory EMG, pain, and stress in chronic low back pain. *Biofeedback Self Regul* 20: 339-355.
30. Han SH, Kim K, Burr JA (2018) Stress-buffering effects of volunteering on salivary cortisol: Results from a daily diary study. *Soc Sci Med* 201: 120-126.
31. Hanson EK, Maas CJ, Meijman TF, Godaert GL (2000) Cortisol secretion throughout the day, perceptions of the work environment, and negative affect. *Ann Behav Med* 22: 316-324.
32. Hanson MD, Chen E (2010) Daily stress, cortisol, and sleep: The moderating role of childhood psychosocial environments. *Health Psychol* 29: 394-402.

33. Hartley SL, DaWalt LS, Hong J, Greenberg JS, Mailick MR (2019) Positive Emotional Support in Premutation Carrier Mothers of Adolescents and Adults With Fragile X Syndrome: Gene by Environment Interactions. *Am J Intellect Dev Disabil* 124: 411-426.
34. Hartley SL, Seltzer MM, Hong J, Greenberg JS, Smith L, et al. (2012) Cortisol response to behavior problems in FMR1 premutation mothers of adolescents and adults with fragile X syndrome: A diathesis-stress model. *Int J Behav Dev* 36: 53-61.
35. Havermans R, Nicolson NA, Berkhof J, deVries MW (2011) Patterns of salivary cortisol secretion and responses to daily events in patients with remitted bipolar disorder. *Psychoneuroendocrinology* 36: 258-265.
36. Hawley LC, Burleson MH, Berntson GG, Cacioppo JT (2003) Loneliness in everyday life: Cardiovascular activity, psychosocial context, and health behaviors. *J Pers Soc Psychol* 85: 105-120.
37. Heissel JA, Sharkey PT, Torrats-Espinosa G, Grant K, Adam EK (2018) Violence and Vigilance: The Acute Effects of Community Violent Crime on Sleep and Cortisol. *Child Dev* 89: e323-e331.
38. Hoppmann CA, Klumb PL (2006) Daily goal pursuits predict cortisol secretion and mood states in employed parents with preschool children. *Psychosom Med* 68: 887-894.
39. Ilies R, Dimotakis N, De Pater IE (2010) Psychological and physiological reactions to high workloads: Implications for well-being. *Pers Psychol* 63: 407-436.
40. Jacobs N, Myin-Germeys I, Derom C, Delespaul P, van Os J, et al. (2007) A momentary assessment study of the relationship between affective and adrenocortical stress responses in daily life. *Biol Psychol* 74: 60-66.



41. Jelsma EB, Goosby BJ, Cheadle JE (2021) Do trait psychological characteristics moderate sympathetic arousal to racial discrimination exposure in a natural setting?  
[References]: *Psychophysiology*. Vol.58(4), 2021, ArtID e13763.
42. Johnson JA, Zawadzki MJ, Jones DR, Reichenberger J, Smyth JM (2021) Intra-individual Associations of Perceived Stress, Affective Valence, and Affective Arousal with Momentary Cortisol in a Sample of Working Adults. *Annals of Behavioral Medicine* 22: 22.
43. Johnston D, Bell C, Jones M, Farquharson B, Allan J, et al. (2016) Stressors, appraisal of stressors, experienced stress and cardiac response: A real-time, real-life investigation of work stress in nurses. *Ann Behav Med* 50: 187-197.
44. Kalpakjian CZ, Farrell DJ, Albright KJ, Chiodo A, Young EA (2009) Association of daily stressors and salivary cortisol in spinal cord injury. *Rehabil Psychol* 54: 288-298.
45. Kamarck TW, Janicki DL, Shiffman S, Polk DE, Muldoon MF, et al. (2002) Psychosocial demands and ambulatory blood pressure: a field assessment approach. *Physiol Behav* 77: 699-704.
46. Thomas MC, Kamarck TW, Li X, Erickson KI, Manuck SB (2019) Physical activity moderates the effects of daily psychosocial stressors on ambulatory blood pressure. *Health Psychol* 38: 925-935.
47. Kamarck TW, Li X, Wright AG, Muldoon MF, Manuck SB (2018) Ambulatory blood pressure reactivity as a moderator in the association between daily life psychosocial stress and carotid artery atherosclerosis. *Psychosom Med* 80: 774-782.
48. Kamarck TW, Shiffman SM, Smithline L, Goodie JL, Paty JA, et al. (1998) Effects of task strain, social conflict, and emotional activation on ambulatory cardiovascular activity:

- daily life consequences of recurring stress in a multiethnic adult sample. *Health Psychol* 17: 17-29.
49. Keneski E, Neff LA, Loving TJ (2018) The Importance of a Few Good Friends: Perceived Network Support Moderates the Association Between Daily Marital Conflict and Diurnal Cortisol. *Soc Psychol Personal Sci* 9: 962-971.
50. Linz R, Singer T, Engert V (2018) Interactions of momentary thought content and subjective stress predict cortisol fluctuations in a daily life experience sampling study. *Sci Rep* 8: 15462.
51. Lippold MA, Davis KD, McHale SM, Buxton OM, Almeida DM (2016) Daily stressor reactivity during adolescence: The buffering role of parental warmth. *Health Psychol* 35: 1027-1035.
52. Lippold MA, McHale SM, Davis KD, Almeida DM, King RB (2016) Experiences With Parents and Youth Physical Health Symptoms and Cortisol: A Daily Diary Investigation. *J Res Adolesc* 26: 226-240.
53. Liu Y, Granger DA, Kim K, Klein LC, Almeida DM, et al. (2017) Diurnal salivary alpha-amylase dynamics among dementia family caregivers. *Health Psychol* 36: 160-168.
54. Liu Y (2017) Aging, caregiving, health and well-being (Doctoral dissertation, The Pennsylvania State University, Pennsylvania, USA).
55. Liu Y, Almeida DM, Rovine MJ, Zarit SH (2018) Modeling cortisol daily rhythms of family caregivers of individuals with dementia: Daily stressors and adult day services use. *J Gerontol B Psychol Sci Soc Sci* 73: 457-467.

56. Lee HY, Jamieson JP, Miu AS, Josephs RA, Yeager DS (2019) An entity theory of intelligence predicts higher cortisol levels when high school grades are declining. *Child Dev* 90: e849-e867.
57. Luecken LJ, Kraft A, Appelhans BM, Enders C (2009) Emotional and cardiovascular sensitization to daily stress following childhood parental loss. *Dev Psychol* 45: 296-302.
58. Lumley MA, Shi W, Wiholm C, Slatcher RB, Sandmark H, et al. (2014) The relationship of chronic and momentary work stress to cardiac reactivity in female managers: feasibility of a smart phone-assisted assessment system. *Psychosom Med* 76: 512-518.
59. Määttänen I, Henttonen P, Valiaho J, Palomaki J, Thibault M, et al. (2021) Positive affect state is a good predictor of movement and stress: combining data from ESM/EMA, mobile HRV measurements and trait questionnaires. *Heliyon* 7: e06243.
60. Nater UM, Rohleder N, Schlotz W, Ehlert U, Kirschbaum C (2007) Determinants of the diurnal course of salivary alpha-amylase. *Psychoneuroendocrinology* 32: 392-401.
61. O'Connor DB, Branley-Bell D, Green JA, Ferguson E, O'Carroll RE, et al. (2020) Effects of childhood trauma, daily stress, and emotions on daily cortisol levels in individuals vulnerable to suicide. *J Abnorm Psychol* 129: 92-107.
62. Peeters F, Nicholson NA, Berkhof J (2003) Cortisol Responses to Daily Events in Major Depressive Disorder. *Psychosom Med* 65: 836-841.
63. Pieper S, Brosschot JF, van der Leeden R, Thayer JF (2007) Cardiac effects of momentary assessed worry episodes and stressful events. *Psychosom Med* 69: 901-909.
64. Pieper S, Brosschot JF, van der Leeden R, Thayer JF (2010) Prolonged cardiac effects of momentary assessed stressful events and worry episodes. *Psychosom Med* 72: 570-577.

65. Polenick CA, Birditt KS, Turkelson A, Perbix EA, Salwi SM, et al. (2021) Daily Social Interactions and HPA Axis Activity Among Midlife and Older Adults. *Gerontologist* 61: 897-906.
66. Pollard TM, Ungpakorn G, Harrison GA, Parkes KR (1996) Epinephrine and cortisol responses to work: A test of the models of Frankenhaeuser and Karasek. *Ann Behav Med* 18: 229-237.
67. Pollard TM, Pearce KL, Rousham EK, Schwartz JE (2007) Do blood pressure and heart rate responses to perceived stress vary according to endogenous estrogen level in women? *Am J Phys Anthropol* 132: 151-157.
68. Potter L (2019) An ecological momentary investigation of weight stigma: Exploring associations between weight vigilance and poor health in everyday life (Doctoral dissertation, The Pennsylvania State University, Pennsylvania, USA).
69. Proulx JA (2015) Are There Gender Differences in Stress Response in Older Adults? : Findings from the Normative Aging Study (Doctoral dissertation, Oregon State University, Oregon, USA).
70. Qu Y, Yang B, Telzer EH (2020) The Cost of Academic Focus: Daily School Problems and Biopsychological Adjustment in Chinese American Families. *JOURNAL OF YOUTH AND ADOLESCENCE* 49: 1631-1644.
71. Savla J, Granger DA, Roberto KA, Davey A, Blieszner R, et al. (2013) Cortisol, alpha amylase, and daily stressors in spouses of persons with mild cognitive impairment. *Psychol Aging* 28: 666-679.

72. Savla J, Roberto KA, Blieszner R, Cox M, Gwazdauskas F (2011) Effects of daily stressors on the psychological and biological well-being of spouses of persons with mild cognitive impairment. *J Gerontol B Psychol Sci Soc Sci* 66: 653-664.
73. Savla J, Zarit SH, Almeida DM (2018) Routine support to parents and stressors in everyday domains: Associations with negative affect and cortisol. *J Gerontol B Psychol Sci Soc Sci* 73: 437-446.
74. Saxbe DE, Repetti RL, Nishina A (2008) Marital satisfaction, recovery from work, and diurnal cortisol among men and women. *Health Psychol* 27: 15-25.
75. Schilling R, Herrmann C, Ludyga S, Colledge F, Brand S, et al. (2020) Does Cardiorespiratory Fitness Buffer Stress Reactivity and Stress Recovery in Police Officers? A Real-Life Study. *FRONTIERS IN PSYCHIATRY* 11.
76. Schlotz W, Schulz P, Hellhammer J, Stone AA, Hellhammer DH (2006) Trait anxiety moderates the impact of performance pressure on salivary cortisol in everyday life. *Psychoneuroendocrinology* 31: 459-472.
77. Schmid RF, Thomas J (2020) Teachers' ambulatory heart rate variability as an outcome and moderating variable in the job demands-resources model. *ANXIETY STRESS AND COPING* 33: 387-402.
78. Schwerdtfeger AR, Dick K (2019) Episodes of momentary resilience in daily life are associated with HRV reductions to stressful operations in firefighters: An ambulatory assessment approach using bayesian multilevel modeling. *J Posit Psychol* 14: 593-602.
79. Seaton EK, Zeiders KH (2021) Daily Racial Discrimination Experiences, Ethnic-Racial Identity, and Diurnal Cortisol Patterns Among Black Adults. *CULTURAL DIVERSITY & ETHNIC MINORITY PSYCHOLOGY* 27: 145-155.

80. Seltzer MM, Greenberg JS, Hong J, Smith LE, Almeida DM, et al. (2010) Maternal cortisol levels and behavior problems in adolescents and adults with ASD. *J Autism Dev Disord* 40: 457-469.
81. Shockley KM, Allen TD (2013) Episodic work-family conflict, cardiovascular indicators, and social support: An experience sampling approach. *J Occup Health Psychol* 18: 262-275.
82. Simon SG, Sloan RP, Thayer JF, Jamner LD (2021) Taking context to heart: Momentary emotions, menstrual cycle phase, and cardiac autonomic regulation. *PSYCHOPHYSIOLOGY* 58.
83. Sladek MR, Doane LD, Gonzales NA, Grimm KJ, Luecken LJ (2019) Latino adolescents' cultural values associated with diurnal cortisol activity. *Psychoneuroendocrinology* 109: 104403.
84. Sladek MR, Doane LD, Luecken LJ, Eisenberg N (2016) Perceived stress, coping, and cortisol reactivity in daily life: A study of adolescents during the first year of college. *Biol Psychol* 117: 8-15.
85. Sladek MR, Doane LD, Breitenstein RS (2020) Daily rumination about stress, sleep, and diurnal cortisol activity. *Cogn Emot* 34: 188-200.
86. Slatcher RB, Robles TF, Repetti RL, Fellows MD (2010) Momentary work worries, marital disclosure, and salivary cortisol among parents of young children. *Psychosom Med* 72: 887-896.
87. Smith PJ, Blumenthal JA, Babyak MA, Georgiades A, Sherwood A, et al. (2007) Ventricular ectopy: impact of self-reported stress after myocardial infarction. *Am Heart J* 153: 133-139.

88. Smyth J, Ockenfels MC, Porter L, Kirschbaum C, Hellhammer DH, et al. (1998) Stressors and mood measured on a momentary basis are associated with salivary cortisol secretion. *Psychoneuroendocrinology* 23: 353-370.
89. Smyth JM, Zawadzki MJ, Juth V, Sciamanna CN (2017) Global life satisfaction predicts ambulatory affect, stress, and cortisol in daily life in working adults. *J Behav Med* 40: 320-331.
90. Stawski RS, Cichy KE, Piazza JR, Almeida DM (2013) Associations among daily stressors and salivary cortisol: Findings from the National Study of Daily Experiences. *Psychoneuroendocrinology* 38: 2654-2665.
91. Stoffel M, Abbruzzese E, Rahn S, Bossmann U, Moessner M, et al. (2021) Covariation of psychobiological stress regulation with valence and quantity of social interactions in everyday life: disentangling intra- and interindividual sources of variation. *JOURNAL OF NEURAL TRANSMISSION* 128: 1381-1395.
92. Timmons AC, Han SC, Chaspari T, Kim Y, Pettit C, et al. (2019) Family-of-origin aggression, dating aggression, and physiological stress reactivity in daily life. *Physiol Behav* 206: 85-92.
93. Uchino BN, Berg CA, Smith TW, Pearce G, Skinner M (2006) Age-related differences in ambulatory blood pressure during daily stress: evidence for greater blood pressure reactivity with age. *Psychol Aging* 21: 231-239.
94. Vaessen T, Kasanova Z, Hernaus D, Lataster J, Collip D, et al. (2018) Overall cortisol, diurnal slope, and stress reactivity in psychosis: An experience sampling approach. *Psychoneuroendocrinology* 96: 61-68.

95. van Eck M, Berkhof H, Nicolson N, Sulon J (1996) The effects of perceived stress, traits, mood states, and stressful daily events on salivary cortisol. *Psychosom Med* 58: 447-458.
96. van Duin ED, Vaessen T, Kasanova Z, Viechtbauer W, Reininghaus U, et al. (2019) Lower cortisol levels and attenuated cortisol reactivity to daily-life stressors in adults with 22q11.2 deletion syndrome. *Psychoneuroendocrinology* 106: 85-94.
97. Volmer J, Fritsche A (2016) Daily negative work events and employees' physiological and psychological reactions. *Front Psychol* 7: 1711.
98. Wong JD, Mailick MR, Greenberg JS, Hong J, Coe CL (2014) Daily work stress and awakening cortisol in mothers of individuals with autism spectrum disorders or Fragile X syndrome. *Fam Relat* 63: 135-147.
99. Wong JD, Seltzer MM, Greenberg JS, Hong J, Almeida DM, et al. (2012) Stressful life events and daily stressors affect awakening cortisol level in midlife mothers of individuals with autism spectrum disorders. *Aging Ment Health* 16: 939-949.
100. Wong JD, Shobo Y (2016) The influences of employment status and daily stressors on physiological functioning in a sample of midlife and older adults. *J Aging Hum Dev* 83: 26-43.
101. Wong JD, Shobo Y (2017) The influences of daily stressors on morning cortisol levels in midlife and older retirees: The moderating roles of age and gender. *J Aging Health* 29: 858-879.
102. Wong JHK, Kelloway EK (2016) What Happens at Work Stays at Work? Workplace Supervisory Social Interactions and Blood Pressure Outcomes. *J Occup Health Psychol* 21: 133-141.



103. Wright L, Bukowski WM (2021) Gender is Key: Girls' and Boys' Cortisol Differs as a Factor of Socioeconomic Status and Social Experiences During Early Adolescence. *Journal of Youth & Adolescence* 50: 1281-1291.
104. Wrzus C, Mueller V, Wagner GG, Lindenberger U, Riediger M (2013) Affective and Cardiovascular Responding to Unpleasant Events From Adolescence to Old Age: Complexity of Events Matters. *Dev Psychol* 49: 384-397.
